# Supplementary material
Source: publisher site journal article supplement (https://www.spandidos-publications.com/1332/downloadSupplementary)
Supplement: Supplementary file 2 [file downloadSupplementary]

## Sheet: Sheet1
Symbol	AS ID	Splice type	Exons	From exon	To exon	Novel splice	Percent with values	PSI range	SD PSI	Chemoresistance
CPSF3L	121	ES	2.1:2.2:3:4:5.2:6.1:6.2	1	7.1	0	0.75	0.9499	0.1804	Risk
TMEM52	232	AP	3.1	null	null	0	0.9024	0.8428	0.1802	Risk
TMEM52	233	AP	1	null	null	0	0.9024	0.8428	0.1802	Protective
MEGF6	315	ES	31	30	32	0	0.9524	1	0.1788	Risk
MEGF6	317	ES	1 day, 2:27:00	25	28	0	0.9524	0.6101	0.1097	Risk
KCNAB2	367	RI	22.2	22.1	22.3	0	0.969	0.8257	0.0657	Protective
AGTRAP	670	AA	4.1	3	4.2	0	0.95	1	0.1492	Protective
AGTRAP	677	ES	00:03:04.200000	1	5	0	0.9595	0.4278	0.0739	Risk
RPS6KA1	1281	AP	7	null	null	0	0.9786	0.581	0.0954	Protective
PIGV	1302	AD	2.3	2.2	3	0	0.8738	0.9031	0.1798	Protective
CSMD2	1689	AT	78	null	null	0	0.9619	0.9837	0.1581	Risk
ZMYM6	1708	AP	1	null	null	0	0.8595	0.8318	0.1572	Protective
ZMYM6	1709	AP	2	null	null	0	0.8595	0.8318	0.1572	Risk
MAP7D1	1761	ES	6	5	7.1	0	0.981	0.4047	0.0677	Risk
OSCP1	1777	AT	7	null	null	0	0.981	0.6855	0.1204	Protective
OSCP1	1778	AT	13.2	null	null	0	0.981	0.6855	0.1204	Risk
EPHA10	1825	AT	21	null	null	0	0.9786	0.6067	0.0764	Risk
EPHA10	1826	AT	3.2	null	null	0	0.9786	0.6067	0.0764	Protective
INPP5B	1850	AA	16.1	15	16.2	0	0.85	1	0.1388	Protective
MACF1	1870	AP	43.1	null	null	0	0.8119	0.9716	0.2446	Protective
MACF1	1871	AP	1	null	null	0	0.8119	0.6314	0.1156	Risk
SCMH1	2051	ES	7	6	8	0	0.9643	0.7507	0.1152	Protective
SCMH1	2054	ES	06:08:00	5	9	0	0.9357	1	0.1612	Risk
DMAP1	2545	RI	1.2:1.3	1.1	1.4	0	0.981	0.6009	0.1117	Protective
DMAP1	2547	RI	1.2	1.1	1.3	0	0.981	0.5899	0.1088	Protective
RNF220	2559	AD	9.2	9.1	10.1	0	0.981	0.4697	0.078	Protective
TMEM53	2563	AA	3.1	2	3.2	0	0.981	0.5578	0.0782	Risk
TMEM69	2770	ES	2	1	3	1	0.9429	0.4845	0.0777	Protective
CYP4X1	2888	AP	1	null	null	0	0.931	1	0.2332	Protective
CYP4X1	2889	AP	2	null	null	0	0.931	1	0.2332	Risk
LRP8	3060	ES	10	9	11	0	0.9381	0.3862	0.0532	Risk
YIPF1	3079	ES	3	2	4	0	0.981	0.698	0.114	Risk
FGGY	3212	ES	15	14	16	0	0.969	0.3067	0.0557	Protective
DEPDC1	3369	ES	8	7	9	0	0.9738	0.8008	0.1321	Protective
SRSF11	3370	AP	1	null	null	0	0.981	0.6164	0.0763	Risk
FPGT-TNNI3K	3457	AT	29	null	null	0	0.8476	0.9739	0.2487	Risk
USP33	3533	AA	15.1	14	15.2	0	0.9714	0.7571	0.1071	Protective
GNG5	3606	RI	1.2	1.1	1.3	0	0.9714	0.9396	0.1211	Risk
HS2ST1	3691	AT	8	null	null	0	0.981	0.4579	0.0827	Risk
HS2ST1	3693	AT	10	null	null	0	0.981	0.3448	0.0732	Protective
GBP3	3708	ES	08:09:00	7	10	0	0.95	0.9676	0.2646	Risk
GBP3	3709	AD	5.2	5.1	6	0	0.9476	0.9818	0.1549	Protective
GBP3	3711	AD	2.2	2.1	4	0	0.8762	0.7797	0.088	Protective
FNBP1L	3788	RI	16.2	16.1	16.3	0	0.981	0.7952	0.1023	Risk
ST7L	4214	ES	6	5	7	0	0.969	0.526	0.0515	Risk
NBPF10	5338	ES	1 day, 5:30:00	28	31.1	0	0.9333	0.8288	0.1542	Risk
NBPF12	7360	ES	9	8	10	0	0.8976	0.742	0.129	Risk
PRKAB2	7364	ES	3	2	4	0	0.8976	0.6446	0.1115	Protective
MTMR11	7412	AP	1	null	null	0	0.9595	0.7905	0.1114	Risk
MTMR11	7413	AP	2.1	null	null	0	0.9595	0.7905	0.1114	Protective
ADAMTSL4	7486	AT	16.2	null	null	0	0.981	0.3604	0.054	Risk
ADAMTSL4	7487	AT	20	null	null	0	0.981	0.3604	0.054	Protective
ARNT	7513	ES	7	6	8	0	0.9738	0.7021	0.1228	Risk
UBAP2L	7814	AT	29	null	null	0	0.981	0.5066	0.0915	Risk
EFNA3	7938	ES	5	4	6	0	0.9786	0.574	0.0817	Risk
MUC1	7974	ES	5	3.4	6.1	1	0.7905	0.6805	0.1139	Risk
RUSC1	8077	AP	1	null	null	0	0.9786	0.8428	0.1658	Risk
RUSC1	8078	AP	3.1	null	null	0	0.9786	0.8428	0.1658	Protective
TSACC	8246	AA	7.1	6	7.2	0	0.8476	1	0.1472	Protective
IGSF9	8424	AA	9.1	8	9.2	0	0.9786	0.3645	0.0507	Risk
DCAF8	8448	ES	7.2:8.1:8.2	7.1	9	1	0.9667	0.8098	0.1438	Risk
ARHGAP30	8539	ES	4	3	5	0	0.8024	0.5026	0.0501	Risk
USP21	8566	ES	2	1	3	0	0.981	0.6745	0.1192	Protective
POGK	8823	RI	6.2	6.1	6.3	0	0.981	0.5464	0.0884	Protective
SUCO	9012	ES	4	3	5	0	0.9071	0.9344	0.167	Protective
RFWD2	9057	AD	6.2	6.1	7	0	0.981	0.4687	0.0543	Protective
GLUL	9148	AD	1.3:1.4	1.2	2	0	0.9762	0.8804	0.1869	Protective
COLGALT2	9202	AT	13	null	null	0	0.9762	0.6673	0.1519	Risk
COLGALT2	9203	AT	12	null	null	0	0.9762	0.6673	0.1519	Protective
DENND1B	9307	ES	3	2	4	0	0.8762	0.8751	0.1897	Protective
ZC3H11A	9462	AD	1.2	1.1	2.1	0	0.8595	0.6297	0.121	Risk
MDM4	9479	ES	11	10	12	0	0.9619	0.5136	0.0899	Risk
LRRN2	9485	AP	1	null	null	0	0.981	0.7768	0.1193	Risk
LRRN2	9486	AP	3.1	null	null	0	0.981	0.7768	0.1193	Protective
ELK4	9560	AT	3.2	null	null	0	0.981	0.6577	0.1148	Protective
ELK4	9561	AT	5	null	null	0	0.981	0.6577	0.1148	Risk
FAM72A	9578	AT	6	null	null	0	0.981	0.7476	0.1089	Protective
HHAT	9697	ES	5	4	6	0	0.7548	0.4965	0.099	Protective
RCOR3	9705	AT	14.2	null	null	0	0.981	0.3991	0.0654	Protective
RCOR3	9708	AT	15	null	null	0	0.981	0.3991	0.0654	Risk
TMEM206	9729	ES	2	1	3	0	0.8714	0.6361	0.0738	Protective
ANGEL2	9775	AP	1	null	null	0	0.981	0.7779	0.1366	Protective
ANGEL2	9776	AP	2	null	null	0	0.981	0.7779	0.1366	Risk
DNAH14	9983	AD	8.2	8.1	10	0	0.8333	0.5121	0.099	Protective
MRPL55	10086	ES	2.5:2.6	2.2	2.8	0	0.9714	0.4426	0.0514	Protective
MRPL55	10096	ES	2.5:2.6	2.2	2.9	0	0.981	0.3731	0.055	Protective
C1orf198	10247	AP	4.1	null	null	0	0.981	0.3865	0.0734	Risk
ZNF692	10560	ES	5.1	4	6.1	0	0.931	0.8703	0.1903	Risk
WDR37	10612	AP	2	null	null	0	0.9786	0.83	0.1441	Protective
NET1	10659	AP	1	null	null	0	0.981	0.8623	0.1359	Protective
NET1	10660	AP	5	null	null	0	0.981	0.8623	0.1359	Risk
PFKFB3	10690	AP	3	null	null	0	0.981	0.5873	0.0781	Protective
PFKFB3	10692	AP	1	null	null	0	0.981	0.564	0.0762	Risk
SEC61A2	10761	AT	16	null	null	0	0.981	0.3818	0.0709	Risk
OPTN	10781	ES	4	3	5.2	0	0.9738	0.7172	0.1273	Protective
OPTN	10783	ES	03:04:00	2	5.2	0	0.981	0.6356	0.0942	Protective
DCLRE1C	10837	AT	18	null	null	0	0.981	0.3607	0.0559	Risk
DCLRE1C	10838	AT	17	null	null	0	0.981	0.3607	0.0559	Protective
RPP38	10862	AD	1.2	1.1	2	0	0.981	0.7808	0.1095	Protective
ACBD5	11069	ES	6	5	7	0	0.8881	0.7088	0.0945	Risk
WAC	11105	ES	9	8	10	0	0.981	0.3403	0.0559	Risk
ZNF239	11337	ES	3.2	1	4	0	0.7929	1	0.216	Protective
ARHGAP22	11484	AP	7	null	null	0	0.9429	0.9517	0.2106	Protective
CCAR1	11956	ES	14	13	15	0	0.981	0.4372	0.0672	Protective
SEC24C	12174	RI	23.2	23.1	23.3	0	0.981	0.3919	0.0524	Protective
SEC24C	12227	ES	2	1	3	0	0.981	0.3949	0.0596	Protective
RPS24	12296	ES	5.2	4	6	0	0.981	0.8031	0.1481	Risk
MMRN2	12439	AA	2.1	1	2.2	0	0.769	1	0.1307	Protective
RNLS	12466	ES	02:03:00	1	4	0	0.9762	0.3629	0.0586	Protective
PCGF5	12509	AT	4	null	null	0	0.981	0.7729	0.1463	Protective
PCGF5	12510	AT	12	null	null	0	0.981	0.7729	0.1463	Risk
BTAF1	12524	ES	00:25:26.100000	24	26.2	0	0.8143	0.5729	0.0927	Risk
HHEX	12536	AP	2.1	null	null	0	0.969	0.7552	0.0976	Protective
HHEX	12537	AP	1	null	null	0	0.969	0.7552	0.0976	Risk
HPS1	12760	AT	10.2	null	null	0	0.981	0.4778	0.0638	Protective
HPS1	12761	AT	20	null	null	0	0.981	0.4778	0.0638	Risk
POLL	12901	AD	1.2:1.3:1.4:1.5	1.1	3	0	0.981	0.5773	0.1171	Protective
POLL	12903	ES	1.2:1.5	1.1	3	0	0.8286	0.8926	0.214	Protective
NFKB2	12948	AA	24.1	23	24.2	0	0.981	0.3832	0.0522	Protective
TMEM180	12952	AT	8	null	null	0	0.981	0.5886	0.0885	Protective
TMEM180	12953	AT	12	null	null	0	0.981	0.5886	0.0885	Risk
CALHM2	13017	AA	3.1	2	3.2	0	0.9714	0.62	0.0787	Protective
MXI1	13079	AP	3	null	null	0	0.981	0.8415	0.1607	Risk
MXI1	13080	AP	1	null	null	0	0.981	0.7835	0.1614	Protective
PWWP2B	13500	AD	2.2	2.1	3	0	0.981	0.3518	0.0628	Risk
PIDD	13766	AD	12.2	12.1	13	0	0.969	0.685	0.1028	Risk
AP2A2	13822	AA	8.1	7	8.2	0	0.981	0.5226	0.055	Protective
PGAP2	14005	AD	11.2	11.1	12	0	0.981	0.486	0.0757	Risk
PGAP2	14025	ES	6	4	10	0	0.9738	0.5574	0.0797	Risk
PPFIBP2	14201	AP	6	null	null	0	0.9548	0.902	0.1948	Protective
PPFIBP2	14203	AP	1	null	null	0	0.9548	0.9737	0.2528	Risk
TMEM9B	14285	AP	1	null	null	0	0.981	0.371	0.0681	Protective
TMEM9B	14286	AP	2	null	null	0	0.981	0.371	0.0681	Risk
AMPD3	14346	AP	4	null	null	0	0.831	0.9004	0.219	Risk
SERGEF	14558	ES	12	11	14	0	0.981	0.6071	0.101	Protective
HPS5	14593	ES	1.3:2	1.2	3	0	0.781	1	0.1188	Protective
HTATIP2	14715	AD	1.2	1.1	1.5	0	0.8857	0.7484	0.1015	Protective
CSTF3	14883	AT	22	null	null	0	0.981	0.762	0.1554	Risk
CSTF3	14884	AT	4.4	null	null	0	0.981	0.762	0.1554	Protective
NR1H3	15709	ES	3.5	1	5.2	0	0.7714	0.7073	0.1281	Protective
MADD	15710	AP	3	null	null	0	0.8476	1	0.1786	Risk
MADD	15713	AP	1	null	null	0	0.8476	0.8334	0.1476	Protective
KBTBD4	15771	AP	2.1	null	null	0	0.9548	0.5461	0.0804	Protective
KBTBD4	15772	AP	1.1	null	null	0	0.9548	0.5461	0.0804	Risk
SLC43A3	15838	AA	5.1	4.2	5.2	0	0.969	0.6263	0.0932	Protective
TMX2	15897	ES	3.3:4:5.1:5.2:5.3	2	6	0	0.9452	0.9802	0.1687	Risk
FAM111A	16027	AA	3.1:3.2	2	3.3	0	0.9643	0.907	0.2237	Risk
FAM111A	16028	ES	3.1	2	3.3	0	0.9143	1	0.2045	Risk
CPSF7	16212	ES	4:6.1:6.2	3	6.3	0	0.7952	0.7035	0.1287	Risk
EEF1G	16350	AP	2	null	null	0	0.981	0.4802	0.0552	Risk
EEF1G	16351	AP	1	null	null	0	0.981	0.4802	0.0552	Protective
C11orf48	16388	RI	1.6	1.5	1.7	0	0.8881	1	0.1893	Protective
POLR2G	16420	RI	2.2:2.3	2.1	2.4	0	0.9786	0.9273	0.1632	Risk
SLC3A2	16467	ES	4.2	3	5.2	0	0.931	1	0.1175	Protective
CCDC88B	16646	ES	25.1:25.2	24	26	0	0.8881	0.5395	0.0713	Risk
CAPN1	16802	AP	3	null	null	0	0.981	0.5253	0.0751	Risk
KLC2	16996	AA	3.2	2	3.3	0	0.9476	0.789	0.1122	Protective
CORO1B	17209	AP	2.1	null	null	0	0.9714	0.6228	0.0973	Risk
CORO1B	17210	AP	1	null	null	0	0.9714	0.6228	0.0973	Protective
RNF121	17462	ES	4	3	6.1	0	0.9738	0.3365	0.051	Protective
RNF121	17463	ES	2	1	3	0	0.9762	0.3764	0.0639	Risk
LRTOMT	17529	RI	6.2:6.3	6.1	6.4	0	0.9643	0.9089	0.1498	Risk
RELT	17693	RI	9.2	9.1	9.3	0	0.9143	0.6798	0.0648	Protective
UCP3	17757	AT	6.2	null	null	0	0.9762	0.6636	0.1372	Protective
UCP3	17758	AT	7	null	null	0	0.9762	0.6636	0.1372	Risk
GDPD5	17865	ES	4	3	5.2	0	0.9048	0.9298	0.1775	Protective
ACER3	17910	ME	5|6	3	7	0	0.9048	0.3697	0.0517	Protective
USP35	18020	ES	2:3:4.2:5:6	1	7.1	0	0.9762	0.4798	0.0603	Protective
GAB2	18022	AP	2	null	null	0	0.9643	0.9062	0.0744	Protective
GAB2	18023	AP	1	null	null	0	0.9643	0.9062	0.0744	Risk
ME3	18193	AP	1.1	null	null	0	0.9429	0.9728	0.1601	Protective
ME3	18195	AP	2.1	null	null	0	0.9429	0.9728	0.1601	Risk
MRE11A	18339	AD	1.2:1.3	1.1	2.1	0	0.8905	1	0.1715	Protective
CCDC82	18411	ES	2	1	3.2	1	0.7786	0.6666	0.147	Protective
CASP1	18542	AA	3.1	2	3.2	0	0.9071	0.6785	0.0652	Risk
COLCA1	18660	AP	1	null	null	0	0.9286	0.7578	0.1013	Protective
COLCA1	18662	AP	2	null	null	0	0.9286	0.7578	0.1013	Risk
DIXDC1	18706	AP	1	null	null	0	0.8905	0.6946	0.109	Protective
C11orf57	18729	ES	1.3	1.1	2.1	0	0.8833	0.3869	0.072	Protective
USP28	18805	ES	21	20	22	0	0.9738	0.4172	0.0625	Protective
TMEM25	19023	AA	2.2	1	2.3	0	0.9143	0.605	0.0928	Risk
TMEM136	19161	AA	2.1	1	2.2	0	0.981	0.6995	0.1507	Protective
TBRG1	19226	ES	03:05:00	2	6	0	0.8571	1	0.1668	Risk
TMEM218	19283	ES	02:03:00	1.2	4.2	0	0.9786	0.5113	0.0554	Protective
CHEK1	19313	RI	13.2	13.1	13.3	0	0.981	0.4531	0.0721	Risk
ARHGAP32	19452	RI	21.2	21.1	21.3	0	0.919	1	0.0925	Protective
RAD52	19643	ES	9	8	10	0	0.9024	1	0.1752	Protective
ERC1	19664	AD	1.2	1.1	3.2	0	0.769	0.8781	0.172	Risk
COPS7A	19956	AD	1.3	1.2	2.4	0	0.981	0.6395	0.087	Risk
LRRC23	20001	ES	9	8	10	0	0.981	0.5822	0.0882	Risk
CLEC2D	20237	ES	7.3:7.4:7.5	7.1	8	0	0.9024	0.8846	0.1617	Risk
CLEC7A	20310	AT	3	null	null	0	0.9714	0.4788	0.0798	Risk
PPFIBP1	20892	AD	13.2	13.1	14	0	0.9524	0.6393	0.106	Risk
PTHLH	20908	AT	6	null	null	0	0.9286	0.5416	0.083	Protective
METTL20	20999	AP	3.1	null	null	0	0.8214	1	0.2169	Risk
METTL20	21001	AP	2	null	null	0	0.8214	1	0.2184	Protective
VDR	21385	ES	4	2.1	5.1	0	0.7905	1	0.1084	Risk
LARP4	21703	ES	10	9	11	0	0.981	0.5696	0.071	Risk
LETMD1	21761	ES	05:06:00	2	7	0	0.969	0.6884	0.1019	Protective
LETMD1	21767	ES	2:3.2:3.3:4:5:6	1.2	7	0	0.919	1	0.2279	Protective
LETMD1	21770	ES	1.3:2:3.2:4:5:6	1.2	7	0	0.9333	0.9281	0.2459	Protective
LETMD1	21771	ES	2:3.2:4:5:6	1.2	7	0	0.981	0.4239	0.053	Protective
LETMD1	21772	ES	1.3:2:4:5:6	1.2	7	0	0.75	0.978	0.2796	Protective
LETMD1	21773	ES	2:4:5:6	1.2	7	0	0.9714	0.8465	0.1361	Protective
LETMD1	21775	ES	02:05:06	1.2	7	0	0.8976	0.8618	0.1963	Protective
LETMD1	21781	ES	1.3:2	1.2	7	0	0.8143	0.9	0.2356	Protective
CSAD	21944	AP	6.1	null	null	0	0.9333	0.7843	0.1423	Risk
ITGB7	21977	ES	2.1:2.2	1	3	0	0.7571	0.4374	0.0691	Risk
PFDN5	22007	ES	2:4.1:4.2	1	5	1	0.9619	0.5308	0.0793	Risk
PRR13	22032	AA	4.3	3	4.4	0	0.9286	0.8553	0.1427	Protective
PRR13	22042	AD	1.2	1.1	3	0	0.981	0.4987	0.0818	Protective
NABP2	22409	RI	1.2:1.3	1.1	1.4	0	0.981	0.7363	0.1192	Protective
SHMT2	22538	AP	3.1	null	null	0	0.981	0.4054	0.0528	Protective
SHMT2	22539	AP	1	null	null	0	0.981	0.5155	0.0793	Risk
MDM1	22932	AA	3.1	2	3.2	0	0.9548	0.9852	0.1469	Protective
C12orf29	23604	ES	2	1	3	0	0.8905	0.5504	0.0626	Protective
POC1B	23638	ES	3.1:3.2	2.2	4	0	0.8024	0.7888	0.1181	Risk
NDUFA12	23740	ES	2.2:5.1	2.1	5.2	0	0.9786	0.5923	0.0911	Risk
PARPBP	24045	AA	4.1	2	4.2	0	0.8357	0.593	0.0858	Risk
IGF1	24052	ES	5.1	4	6	0	0.8452	0.4594	0.0531	Protective
C12orf73	24076	ES	5	2.4	6	0	0.981	0.846	0.1325	Protective
C12orf23	24181	ES	3.1:3.2	2.2	4.2	0	0.931	0.4171	0.0584	Risk
TMEM116	24551	ES	7	6	8	0	0.8381	0.573	0.1057	Protective
TMEM116	24566	ES	3	2	4	0	0.9619	0.7566	0.1251	Protective
C12orf52	24622	ES	2.2	1	3	0	0.9452	1	0.1761	Risk
RFC5	24685	ES	2.1:2.2	1	3	0	0.9786	0.6982	0.1188	Protective
DYNLL1	24763	RI	4.2	4.1	4.3	0	0.981	0.5514	0.0736	Protective
CAMKK2	24845	AP	1	null	null	0	0.9381	0.4001	0.0525	Protective
RNF34	24870	ES	2	1	3	0	0.9738	0.5134	0.0905	Protective
NCOR2	25143	AD	46.2	46.1	47	0	0.981	0.6644	0.1043	Protective
EP400NL	25239	AP	1	null	null	0	0.9738	0.9507	0.1353	Protective
EP400NL	25240	AP	2.1	null	null	0	0.9738	0.9544	0.1203	Risk
ZNF605	25320	ES	2	1	3	0	0.8405	1	0.1956	Protective
PSPC1	25402	AT	9	null	null	0	0.981	0.6752	0.1373	Protective
PSPC1	25403	AT	11	null	null	0	0.981	0.5149	0.0949	Risk
SKA3	25445	ES	3:4:5:6:7	1.1	8	0	0.7786	1	0.2169	Risk
RFC3	25610	AT	9	null	null	0	0.981	0.4461	0.0522	Protective
RFC3	25611	AT	10	null	null	0	0.981	0.4461	0.0522	Risk
SUPT20H	25667	AA	7.1	6	7.2	0	0.9548	0.704	0.0885	Risk
RNASEH2B	25926	AT	11	null	null	0	0.981	0.5441	0.0991	Protective
RNASEH2B	25927	AT	12	null	null	0	0.981	0.5441	0.0991	Risk
SLAIN1	26088	AP	1	null	null	0	0.9405	0.8979	0.1718	Risk
SLAIN1	26089	AP	5	null	null	0	0.9405	0.8979	0.1684	Protective
ABCC4	26113	ES	02:03:00	1	4	0	0.7667	0.6636	0.127	Protective
UGGT2	26132	ES	9	7	10	0	0.969	0.3348	0.0549	Protective
MBNL2	26144	ES	7	6.3	8	0	0.9619	0.9684	0.1766	Protective
DOCK9	26178	ES	48	47	49	1	0.9333	0.7585	0.1427	Risk
TMTC4	26199	ES	2	1	3	0	0.9738	0.8011	0.1209	Protective
GMPR2	26928	AD	1.2	1.1	2.3	0	0.981	0.5971	0.0993	Risk
SDR39U1	27009	AA	8.1	7	8.2	0	0.981	0.3919	0.0673	Risk
COCH	27088	AT	11	null	null	0	0.8857	0.8274	0.108	Protective
COCH	27090	AT	12	null	null	0	0.8857	0.8274	0.108	Risk
ARHGAP5	27127	AP	1	null	null	0	0.7905	0.8143	0.1785	Risk
ARHGAP5	27128	AP	2	null	null	0	0.7905	0.8143	0.1785	Protective
NPAS3	27139	AP	1	null	null	0	0.9286	0.8539	0.2076	Protective
NPAS3	27140	AP	2	null	null	0	0.9286	0.8551	0.2062	Risk
NPAS3	27146	AA	6.1	4.2	6.2	0	0.831	0.6758	0.089	Protective
FAM177A1	27187	RI	3.2	3.1	3.3	0	0.981	0.6461	0.1477	Risk
PPP2R3C	27210	ES	3	1.3	4.2	0	0.981	0.5619	0.0928	Protective
KIAA0391	27213	AP	2.1	null	null	0	0.9762	0.7944	0.129	Protective
KIAA0391	27214	AP	1	null	null	0	0.9762	0.7944	0.129	Risk
KIAA0391	27217	ES	4	3.2	5	0	0.981	0.3799	0.0697	Risk
TRAPPC6B	27360	ES	4	3	5	0	0.969	0.5504	0.0864	Protective
ATL1	27486	ES	15	13	16	0	0.8786	0.926	0.111	Risk
BMP4	27568	AD	1.2	1.1	3.2	0	0.8024	0.5528	0.1165	Risk
SLC38A6	27787	AA	21.1	20.2	21.2	0	0.869	0.7435	0.1332	Protective
ZBTB1	27892	AT	4.2	null	null	0	0.981	0.3288	0.0635	Protective
ZBTB1	27893	AT	5	null	null	0	0.981	0.3288	0.0635	Risk
GPHN	28036	ES	2	1	3	0	0.8571	1	0.1741	Protective
FAM71D	28041	AT	14	null	null	0	0.9667	0.512	0.088	Protective
PSEN1	28273	AD	1.2	1.1	3	0	0.9405	0.5069	0.0707	Protective
NUMB	28288	ES	13	12	14	0	0.981	0.8827	0.155	Protective
JDP2	28500	AP	2	null	null	0	0.981	0.5847	0.1023	Risk
JDP2	28503	AP	4	null	null	0	0.981	0.545	0.1014	Protective
NOXRED1	28594	AT	4.2	null	null	0	0.9238	0.7509	0.122	Risk
NOXRED1	28595	AT	6	null	null	0	0.9238	0.7509	0.122	Protective
CALM1	28824	ES	1.2:3	1.1	4	0	0.8786	1	0.2042	Risk
SERPINA1	29117	ES	2.1:2.2:2.4	1.1	2.5	0	0.769	1	0.1986	Protective
SERPINA1	29121	AA	2.4	1.1	2.5	0	0.7738	0.8449	0.1242	Protective
SERPINA1	29123	AA	2.1:2.2:2.3	1.1	2.4	0	0.8095	1	0.3321	Risk
SERPINA1	29132	ES	2.1:2.2:2.4:2.5	1.1	3.2	0	0.9548	0.5836	0.0521	Protective
MOK	29384	ES	9	8	10.2	0	0.8071	0.7629	0.1376	Protective
MARK3	29447	ES	17	16	18	0	0.931	1	0.2194	Risk
KLC1	29468	AT	14.3	null	null	0	0.981	0.5499	0.0853	Protective
KLC1	29475	ES	14.1:15	13.3	18	0	0.9357	0.5147	0.0509	Protective
JAG2	29601	ES	10	9	11	0	0.95	0.7162	0.13	Protective
MEIS2	29905	AP	1	null	null	0	0.95	0.6052	0.1011	Protective
PAK6	29956	AP	1	null	null	0	0.9738	0.5936	0.0838	Protective
PAK6	29958	AP	2	null	null	0	0.9738	0.4077	0.068	Protective
GCHFR	30029	AP	1	null	null	0	0.981	0.7057	0.1236	Protective
GCHFR	30031	AP	3.1	null	null	0	0.981	0.7003	0.1234	Risk
CKMT1A	30308	AA	3.1	2.2	3.2	0	0.9119	0.7305	0.0695	Protective
SHF	30414	ES	8.1:8.2:9.1	6	10	0	0.9667	0.7605	0.1241	Risk
DUT	30484	AP	2.1	null	null	0	0.981	0.718	0.131	Risk
DUT	30485	AP	3.1	null	null	0	0.981	0.7166	0.1288	Protective
CSNK1G1	31112	ES	12	10	13	0	0.8714	1	0.1647	Protective
CALML4	31354	ES	03:04:00	1	5	0	0.8286	0.6703	0.0792	Risk
TLE3	31413	AD	14.2:14.3	14.1	15.1	0	0.931	0.7852	0.1109	Risk
ADPGK	31587	ES	02:03:00	1.3	4	0	0.9214	0.508	0.0618	Protective
ETFA	31941	ES	4	1	5	0	0.9643	0.4572	0.0756	Protective
TTC23	32618	ES	03:04:00	2.3	6	0	0.7786	0.7388	0.1658	Protective
TM2D3	32769	RI	1.2	1.1	1.3	0	0.9786	0.3762	0.0561	Protective
WASH4P	32775	AD	6.2	6.1	7	0	0.981	0.687	0.1289	Risk
RHBDF1	32790	RI	11.2	11.1	11.3	0	0.9595	0.2659	0.0563	Protective
RAB40C	32914	RI	3.2	3.1	3.3	0	0.9476	0.9599	0.1469	Risk
C16orf13	32917	ES	3	2	5	0	0.981	0.3325	0.0581	Risk
C16orf13	32922	ES	3	1	5	0	0.981	0.7821	0.1523	Risk
TSC2	33194	ES	00:27:28.100000	26	28.2	0	0.9762	0.8837	0.1576	Protective
RNPS1	33256	AD	2.2:2.3	2.1	3	0	0.9548	0.6476	0.1121	Risk
RNPS1	33261	ES	3	1.1	4	0	0.981	0.4119	0.0767	Protective
UBALD1	33770	AA	2.3:2.4	1.2	2.5	0	0.9333	0.8702	0.1223	Risk
UBALD1	33772	ES	1.3:2.3	1.2	2.5	0	0.9214	0.5338	0.1103	Risk
CLEC16A	34006	AD	11.2	11.1	12	0	0.9452	1	0.1667	Risk
ABCC6	34219	AT	2.2	null	null	0	0.981	0.8084	0.1528	Protective
ABCC6	34220	AT	32	null	null	0	0.981	0.8084	0.1528	Risk
COQ7	34281	AP	1	null	null	0	0.981	0.5503	0.0812	Protective
COQ7	34282	AP	2.1	null	null	0	0.981	0.5503	0.0812	Risk
SYT17	34293	AT	9	null	null	0	0.981	0.7584	0.1224	Risk
SYT17	34294	AT	8	null	null	0	0.981	0.7584	0.1224	Protective
ACSM3	34389	ES	5	4	6	0	0.9095	0.6918	0.1075	Protective
UQCRC2	35524	ES	05:06:00	4	7	0	0.981	0.519	0.0634	Protective
NPIPB5	35568	ES	3.1	2.5	5	0	0.9714	0.7838	0.1602	Protective
RBBP6	35644	ES	16	15	17	0	0.9357	0.8375	0.1329	Risk
TAOK2	35996	AP	9.1	null	null	0	0.981	0.3421	0.0564	Protective
TAOK2	35997	AP	1	null	null	0	0.981	0.3421	0.0564	Risk
YPEL3	36066	AP	2.1	null	null	0	0.981	0.3841	0.0502	Risk
YPEL3	36068	AP	1.1	null	null	0	0.981	0.3841	0.0502	Protective
SIAH1	36338	AP	7	null	null	0	0.981	0.4319	0.0662	Protective
SIAH1	36340	AP	6	null	null	0	0.981	0.7863	0.1316	Risk
ZNF423	36351	AP	8	null	null	0	0.8095	1	0.2484	Risk
BRD7	36379	AA	14.1	13	14.2	0	0.981	0.3703	0.0508	Risk
CHD9	36412	AD	34.2	34.1	35	0	0.7976	0.4715	0.1029	Risk
GPR56	36580	AA	16.1	15	16.2	0	0.981	0.4251	0.0742	Protective
GPR56	36585	AD	3.2	3.1	5.2	0	0.8381	0.6518	0.0746	Risk
GPR56	36589	ES	5.2	3.1	7.2	0	0.95	0.8474	0.1039	Protective
KIFC3	36604	AP	8	null	null	0	0.9214	0.6144	0.1192	Protective
KIFC3	36608	ES	28	27	29	0	0.9714	0.3556	0.0556	Risk
KIFC3	36615	ES	7	5	13	0	0.8548	1	0.1947	Protective
HSF4	36948	ES	10.2	9	11.2	0	0.8571	0.4935	0.0592	Risk
PLEKHG4	37004	AD	1.5:1.6:1.7	1.4	2	0	0.8357	0.6249	0.0724	Protective
CENPT	37140	ES	6.1:6.2:6.3	5	7.2	0	0.8643	0.9013	0.1675	Protective
CENPT	37143	AA	6.1:6.2	5	6.3	0	0.981	0.4103	0.0542	Protective
ZFP90	37236	AA	4.1	3	4.2	0	0.9024	0.6396	0.1275	Protective
ZNF821	37499	ES	10	9.2	11	0	0.9762	0.5831	0.0908	Risk
ZNF821	37507	ES	4	3.3	6	0	0.9143	0.6719	0.1238	Protective
GLG1	37565	RI	27.2	27.1	27.3	0	0.981	0.4569	0.0583	Risk
BCAR1	37595	AP	3	null	null	0	0.981	0.9457	0.1178	Risk
TMEM170A	37613	AD	5.3	5.2	6.1	0	0.9381	0.8619	0.144	Protective
ADAT1	37634	AA	5.1	4	5.2	0	0.8119	0.46	0.07	Protective
NUDT7	37669	ES	2	1	5	0	0.8429	0.3254	0.0593	Protective
CMC2	37724	ES	10	5	12	0	0.8595	0.9025	0.159	Protective
DBNDD1	38197	AP	2	null	null	0	0.981	0.7417	0.1001	Risk
SLC43A2	38344	AP	2	null	null	0	0.95	0.5686	0.098	Risk
INCA1	38643	AA	7.1	6	7.2	0	0.8333	0.5393	0.1099	Risk
KIAA0753	38763	ES	4	3	6	0	0.8667	0.8599	0.129	Protective
XAF1	38791	ES	7	6	8	0	0.9381	0.8066	0.1533	Protective
XAF1	38810	ES	4.3	2.1	6	0	0.8357	0.6481	0.1246	Protective
TNK1	38930	AA	10.1	9	10.2	0	0.9143	0.3344	0.0556	Protective
TNK1	38931	AA	4.1	3	4.2	0	0.8452	0.4641	0.0775	Protective
TMEM256-PLSCR3	38940	RI	5.3:5.4	5.2	5.5	0	0.9738	0.906	0.1726	Protective
TMEM102	38951	RI	1.2	1.1	1.3	0	0.981	0.4771	0.061	Protective
ZBTB4	38962	AP	1	null	null	0	0.9714	0.9591	0.1242	Protective
ZBTB4	38963	AP	2	null	null	0	0.9714	0.9591	0.1242	Risk
MPDU1	39002	AD	5.3	5.2	7	1	0.9524	0.5021	0.0721	Risk
DNAH2	39052	AT	88	null	null	0	0.8667	0.8404	0.1169	Protective
DNAH2	39053	AT	14.2	null	null	0	0.8667	0.8404	0.1169	Risk
LGALS9	39856	ES	05:06:00	4	7	0	0.981	0.5647	0.0706	Protective
SSH2	40065	RI	1.2	1.1	1.3	0	0.9786	0.3926	0.0661	Protective
RAD51D	40263	ES	5	4	7	0	0.85	0.7539	0.1528	Risk
NLE1	40281	ES	2.1:2.2	1.3	3.1	0	0.7929	0.7504	0.1661	Risk
TADA2A	40522	AD	6.2	6.1	7	0	0.9452	0.3767	0.055	Risk
PCGF2	40582	AP	2.1	null	null	0	0.9762	0.8501	0.1538	Risk
PSMB3	40593	ES	4.2	3	5	0	0.9643	0.3941	0.0543	Protective
JUP	40930	AT	15.3	null	null	0	0.981	0.5377	0.1001	Risk
JUP	40931	AT	22	null	null	0	0.981	0.5377	0.1001	Protective
NKIRAS2	40986	ES	5.5:5.6	5.3	7	0	0.9143	1	0.1745	Risk
CCR10	41105	AP	2	null	null	0	0.769	0.937	0.282	Protective
CCR10	41106	AP	1	null	null	0	0.769	0.937	0.282	Risk
TMUB2	41803	AA	4.2	3	4.3	1	0.8762	0.6897	0.106	Protective
DBF4B	41887	AA	10.1	9	10.2	0	0.9476	0.7446	0.1332	Risk
KIF18B	41925	AA	13.1	12	13.2	0	0.9571	0.7166	0.086	Protective
DCAKD	41928	AP	2	null	null	0	0.9786	0.7483	0.1325	Protective
CRHR1	41978	AP	4	null	null	0	0.9738	0.7746	0.1057	Risk
CRHR1	41979	AP	1	null	null	0	0.9738	0.7746	0.1057	Protective
ATP5G1	42240	AD	1.2	1.1	2	0	0.981	0.2793	0.0518	Protective
NXPH3	42300	AT	3	null	null	0	0.9524	0.7119	0.1289	Risk
NXPH3	42301	AT	2.2	null	null	0	0.9524	0.7119	0.1289	Protective
EPN3	42415	AD	1.2	1.1	2.1	0	0.9548	0.4991	0.0797	Protective
SPAG9	42494	ES	30	29	31	0	0.95	0.9633	0.1824	Risk
TLK2	42907	AA	4.1	2	4.2	0	0.9071	0.8206	0.113	Protective
C17orf58	43119	RI	1.2	1.1	1.3	0	0.981	0.7058	0.111	Protective
MAP2K6	43187	AP	2	null	null	0	0.9619	0.8462	0.1583	Protective
FAM104A	43212	ES	3.1:3.2:4	1	5	0	0.9762	0.5716	0.0861	Protective
NT5C	43359	RI	4.2:4.3	4.1	4.4	0	0.9548	1	0.16	Protective
LLGL2	43463	ES	26	25	27	0	0.981	0.5035	0.0826	Risk
JMJD6	43621	ES	5.1:5.2	4	6	0	0.981	0.4005	0.0644	Risk
METTL23	43627	RI	4.3	4.2	4.4	0	0.9762	0.6404	0.115	Protective
METTL23	43641	AD	1.4	1.3	3	0	0.9786	0.7839	0.0978	Protective
MFSD11	43685	AD	2.4	2.3	2.6	0	0.8976	0.7838	0.1474	Risk
GAA	44021	ES	2.2	1	3	1	0.9143	0.8618	0.1222	Risk
ENTHD2	44111	ES	8	7	9	0	0.981	0.5221	0.0875	Risk
MAFG	44238	AP	1	null	null	0	0.9286	0.7057	0.1382	Risk
MAFG	44239	AP	2	null	null	0	0.9286	0.7057	0.1382	Protective
GPS1	44280	AA	1.4	1.1	1.5	0	0.931	0.7481	0.1003	Protective
C17orf62	44346	ES	5.2	4.3	6	0	0.981	0.4362	0.0723	Protective
CLUL1	44448	AP	1	null	null	0	0.8929	1	0.1802	Risk
CLUL1	44450	AP	2	null	null	0	0.8929	1	0.1695	Protective
C18orf56	44455	AT	3	null	null	0	0.9738	0.8913	0.1456	Risk
C18orf56	44456	AT	2	null	null	0	0.9738	0.8913	0.1456	Protective
ENOSF1	44475	ES	3	2	4	0	0.9762	0.414	0.0738	Risk
TGIF1	44498	AP	4.1	null	null	0	0.981	0.7437	0.0992	Risk
EPB41L3	44533	ES	25	24	26	0	0.8881	0.5487	0.0773	Risk
TMEM241	44802	ES	10	9	11	0	0.7905	0.8128	0.113	Protective
TMEM241	44808	ES	7	6	8	0	0.8714	0.8923	0.1402	Risk
TMEM241	44817	ES	2	1	3	0	0.7833	0.3073	0.0595	Risk
MBD1	45507	AA	18.4	18.1	18.5	1	0.8976	0.7205	0.0913	Risk
PQLC1	46257	ES	06:07:09	5	10	0	0.9714	0.7736	0.155	Protective
ZNF559	47275	RI	6.2	6.1	6.3	0	0.9024	0.9659	0.182	Risk
ZNF177	47292	AP	10	null	null	0	0.75	0.7997	0.1495	Protective
FBXL12	47420	ES	4.2	2.4	5	0	0.9786	0.4302	0.072	Protective
DNMT1	47475	ES	5	4.2	6	0	0.9786	0.6271	0.0888	Risk
CDKN2D	47553	RI	1.2	1.1	1.3	0	0.9738	0.7473	0.1365	Risk
DHPS	47831	AA	9.1	7	9.2	0	0.9714	0.4052	0.056	Risk
SMIM7	48190	AD	7.2	7.1	9.1	0	0.9714	0.9635	0.1304	Risk
MYO9B	48231	AD	39.3	39.2	40	0	0.9786	0.5781	0.0913	Protective
OCEL1	48244	ES	4	3	5	0	0.981	0.3853	0.0652	Risk
USHBP1	48249	AA	3.1:3.2	2	3.3	0	0.85	0.6708	0.1071	Protective
SLC27A1	48315	RI	4.2:4.3	4.1	4.4	0	0.9762	0.8474	0.1287	Protective
SUGP2	48549	ES	12.5	12.3	14	0	0.9762	0.9799	0.2309	Protective
MEF2B	48590	AP	1	null	null	0	0.7762	0.918	0.2591	Risk
MEF2B	48591	AP	6	null	null	0	0.7762	0.918	0.2591	Protective
MEF2B	48594	AA	14.2:14.3	13	14.4	0	0.8738	0.9741	0.1777	Risk
LPAR2	48663	AP	1	null	null	0	0.981	0.3456	0.0592	Protective
LPAR2	48664	AP	2.1	null	null	0	0.981	0.3456	0.0592	Risk
LPAR2	48666	ES	03:04:00	2.2	5.2	0	0.9786	0.9407	0.1723	Protective
ZNF738	48766	AA	7.2	6.1	7.3	0	0.75	0.5508	0.113	Protective
ZNF302	48985	ES	4:5.1:5.2:6.1	2	6.2	0	0.8476	0.5317	0.1014	Protective
U2AF1L4	49268	ES	00:08:09.100000	7	9.2	0	0.981	0.3241	0.0549	Risk
ALKBH6	49324	AA	6.1	5	6.2	0	0.981	0.4143	0.0598	Protective
CAPNS1	49368	AD	1.2	1.1	2.3	0	0.9762	0.6258	0.091	Protective
ZNF527	49506	AT	6.2	null	null	0	0.9714	0.9556	0.1857	Risk
ZNF527	49507	AT	5.4	null	null	0	0.9714	0.9556	0.1857	Protective
ZNF540	49541	AP	2	null	null	0	0.7571	1	0.2756	Risk
ZNF540	49542	AP	1	null	null	0	0.7571	1	0.2756	Protective
ZNF607	49567	AA	5.1	4	5.2	0	0.7857	0.8727	0.1157	Risk
YIF1B	49610	AD	2.2	2.1	3.2	0	0.95	0.7547	0.1219	Risk
PLEKHG2	49821	AP	1	null	null	0	0.981	0.6689	0.1279	Risk
PLEKHG2	49822	AP	2	null	null	0	0.981	0.6689	0.1279	Protective
ARHGEF1	50098	AP	1	null	null	0	0.9762	0.7992	0.1571	Risk
ARHGEF1	50099	AP	2	null	null	0	0.9762	0.7992	0.1571	Protective
ZNF45	50253	AP	7.1	null	null	0	0.8333	0.8347	0.0856	Protective
ZNF45	50254	AP	1	null	null	0	0.8333	0.8347	0.0856	Risk
PPP1R13L	50435	AP	2	null	null	0	0.9262	0.8857	0.1628	Risk
PPP1R13L	50436	AP	1	null	null	0	0.9262	0.8857	0.1628	Protective
CD3EAP	50437	AD	1.2	1.1	2	0	0.9452	0.7058	0.0915	Protective
ERCC1	50445	ES	00:08:10.100000	7	11	0	0.981	0.5158	0.0888	Protective
IRF3	50992	ES	6.2	4	7	0	0.7595	0.8279	0.1471	Risk
AKT1S1	51109	AP	2	null	null	0	0.981	0.526	0.0757	Risk
VRK3	51152	AD	1.2	1.1	2.2	0	0.9762	0.4354	0.0597	Risk
ZNF841	51403	AP	1	null	null	0	0.931	0.7785	0.1439	Risk
ZNF841	51405	AP	2.1	null	null	0	0.931	0.7785	0.1439	Protective
ZNF610	51446	AD	3.2	3.1	4	0	0.9476	1	0.1056	Risk
RPS9	51816	RI	4.4	4.3	4.5	0	0.981	0.6159	0.1131	Protective
RPS9	51817	RI	4.2	4.1	4.3	0	0.981	0.539	0.0873	Protective
LILRB5	51850	AA	13.1	12	13.2	0	0.9238	0.7029	0.1687	Risk
DNAAF3	52037	AA	10.1	9	10.2	0	0.8738	0.6412	0.1092	Risk
DNAAF3	52039	AA	3.1	2	3.2	0	0.7571	0.4092	0.0562	Protective
ZNF667	52180	ES	00:02:03.200000	1	6	0	0.8667	1	0.2183	Protective
ZNF671	52331	RI	3.2	3.1	3.3	0	0.8881	1	0.2868	Protective
ZNF586	52341	ES	3	1	4	0	0.8333	0.6025	0.1167	Protective
ZNF135	52389	AT	5.4	null	null	0	0.981	0.6128	0.0722	Protective
ZNF135	52390	AT	7	null	null	0	0.981	0.6128	0.0722	Risk
ZSCAN18	52408	AD	3.2	3.1	4	1	0.9524	0.5488	0.0814	Protective
ZNF544	52425	AT	10.2	null	null	0	0.981	0.7723	0.1272	Protective
ZNF544	52426	AT	12	null	null	0	0.981	0.7742	0.1298	Risk
ZNF544	52427	ES	11	7.2	12	0	0.8905	1	0.1349	Protective
ZNF584	52452	ES	4.2	3	5	0	0.9262	0.6418	0.094	Protective
SH3YL1	52494	AP	2	null	null	0	0.981	0.5132	0.0836	Protective
SH3YL1	52504	ES	7	6	8	0	0.9524	1	0.1834	Risk
ITGB1BP1	52617	AA	8.1:8.2	7	8.3	0	0.981	0.9172	0.1926	Risk
E2F6	52693	ES	3	1	5.1	0	0.9357	0.7175	0.1065	Protective
PUM2	52773	AD	19.2	19.1	20	0	0.9762	0.7116	0.0766	Protective
CENPA	52915	ES	3.1:3.2	2	4	0	0.881	0.8751	0.1347	Protective
AGBL5	52926	ES	14	13	15	0	0.969	0.8269	0.1235	Risk
KRTCAP3	53013	AT	8	null	null	0	0.9786	0.436	0.0811	Protective
KRTCAP3	53014	AT	7.2	null	null	0	0.9786	0.436	0.0811	Risk
MRPL33	53046	ES	3	2	4	0	0.981	0.6575	0.1081	Protective
PLB1	53066	ES	1 day, 18:43:44	41	45	0	0.8357	0.86	0.172	Protective
MEMO1	53140	AP	2.1	null	null	0	0.981	0.4302	0.0659	Risk
MEMO1	53141	AP	1	null	null	0	0.981	0.4302	0.0658	Protective
LTBP1	53185	AA	12.1	11	12.2	0	0.9024	0.7794	0.1362	Protective
NDUFAF7	53223	ES	6	5.1	7	0	0.8286	0.8044	0.1729	Protective
PREPL	53439	AA	2.2	1.3	2.3	0	0.781	1	0.2084	Protective
MCFD2	53475	ES	05:06:00	3	7	0	0.8333	0.9044	0.21	Protective
C1D	53822	ES	2.2	1.1	3.1	0	0.981	0.8499	0.1258	Risk
CNRIP1	53838	RI	1.2	1.1	1.3	0	0.8571	0.7589	0.128	Risk
SMYD5	53954	AA	3.1:3.2	2	3.3	0	0.7952	1	0.1864	Risk
BOLA3	54017	ES	3	2	4	0	0.981	0.5811	0.1014	Protective
MRPL19	54157	AT	6.2	null	null	0	0.981	0.6505	0.0576	Protective
ELMOD3	54212	ES	7.3	7.1	8	0	0.9786	0.6795	0.1008	Risk
ELMOD3	54246	RI	2.2	2.1	2.3	0	0.8833	1	0.196	Protective
ELMOD3	54248	ES	2.1	1	2.3	0	0.9286	1	0.1792	Risk
TMEM150A	54305	ES	7	5	8	0	0.981	0.4912	0.0697	Risk
ANKRD36	54594	AT	76	null	null	0	0.9786	0.8163	0.1413	Protective
ANKRD36	54595	AT	77	null	null	0	0.9786	0.8163	0.1498	Risk
ANKRD36	54597	ES	73	72	74	0	0.919	0.6842	0.1427	Protective
UNC50	54643	RI	1.2:1.3	1.1	1.4	1	0.8595	0.8723	0.1975	Protective
MRPL30	54684	AP	1	null	null	0	0.7952	0.897	0.134	Risk
MRPL30	54685	AP	3	null	null	0	0.7952	0.897	0.134	Protective
RPL31	54735	RI	2.3	2.2	2.4	0	0.9786	0.8614	0.182	Protective
FHL2	54834	ES	2.3:3.2	2.2	5.1	0	0.981	0.6934	0.1102	Protective
BCL2L11	54956	ES	9	7	11	0	0.9738	0.5154	0.0839	Protective
PCDP1	55134	ES	3	2	6	0	0.8405	0.3855	0.0674	Protective
SMPD4	55295	ES	11:12:14	10	15.1	0	0.7786	0.8896	0.215	Protective
SMPD4	55300	ES	11	10	14	0	0.981	0.7613	0.1248	Protective
CCNT2	55414	ES	6.2	5	7.1	0	0.7905	0.3827	0.0594	Protective
LYPD6	55555	AP	2	null	null	0	0.9095	0.4203	0.0564	Risk
HOXD8	56110	RI	1.2:1.3:1.4:1.5	1.1	1.6	0	0.9762	0.6077	0.0888	Risk
NFE2L2	56128	AP	6	null	null	0	0.981	0.5216	0.0913	Risk
NFE2L2	56129	AP	5	null	null	0	0.981	0.4939	0.0862	Protective
SSFA2	56443	AD	13.2	13.1	14	0	0.9667	0.6986	0.0974	Protective
GULP1	56496	AP	1	null	null	0	0.931	0.9382	0.1347	Risk
GULP1	56497	AP	2.1	null	null	0	0.931	0.9382	0.1341	Protective
GLS	56586	AP	1	null	null	0	0.981	0.3452	0.0578	Risk
GLS	56588	AP	12.1	null	null	0	0.981	0.3452	0.0579	Protective
NIF3L1	56773	ES	00:02:03.200000	1.2	3.3	0	0.8619	0.7747	0.1409	Protective
NDUFB3	56780	AA	2.1	1	2.2	0	0.9571	0.5872	0.1057	Protective
CFLAR	56794	AT	17	null	null	0	0.981	0.4281	0.0845	Risk
ALS2	56916	AT	4.2	null	null	0	0.981	0.4872	0.0859	Protective
ALS2	56917	AT	35	null	null	0	0.981	0.4872	0.0859	Risk
SUMO1	56939	ES	03:04:00	1	5.1	0	0.9452	0.7419	0.1099	Protective
RAPH1	57077	AT	16	null	null	0	0.9714	0.7512	0.1097	Protective
METTL21A	57184	AP	4.1	null	null	0	0.969	0.7708	0.1452	Risk
METTL21A	57196	AD	2.2	2.1	4.2	0	0.9762	0.8246	0.118	Risk
ZNF142	57511	RI	1.2:1.3	1.1	1.4	0	0.9286	0.8219	0.1421	Risk
STK16	57666	ES	4	3.2	5	1	0.981	0.2999	0.0547	Risk
CCL20	57831	AA	2.1	1	2.2	0	0.7714	0.8773	0.1196	Risk
TRIP12	57856	ES	3	2	4.1	0	0.9548	0.6976	0.1175	Protective
2019-09-02	58366	ES	06:07:00	2	9	0	0.8214	1	0.2068	Protective
2019-09-02	58370	ES	04:07:00	2	9	0	0.9381	1	0.1263	Protective
STK25	58385	AP	3.1	null	null	0	0.981	0.615	0.1073	Risk
FAM110A	58466	AP	4.1	null	null	0	0.9762	0.4453	0.0754	Protective
FAM110A	58467	AP	1	null	null	0	0.9762	0.4453	0.0804	Risk
SEC23B	58800	AP	1.1	null	null	0	0.9786	0.4856	0.0656	Protective
SEC23B	58801	AP	2	null	null	0	0.9786	0.4856	0.0656	Protective
SEC23B	58804	AD	1.2	1.1	3	0	0.969	0.7523	0.08	Risk
ID1	58896	RI	1.2	1.1	1.3	0	0.981	0.3731	0.0728	Protective
DNMT3B	58964	ES	23	22	24	0	0.9071	0.4337	0.0543	Protective
PABPC1L	59497	ES	14	13	15	0	0.9714	0.3485	0.0549	Risk
SYS1-DBNDD2	59533	ES	4	3	5	0	0.8024	0.6762	0.1087	Protective
DBNDD2	59536	AP	1.1	null	null	0	0.9786	0.683	0.1271	Risk
PIGT	59561	ES	4	1	5.2	0	0.8952	0.6255	0.0756	Protective
ZMYND8	59722	ES	3.2	1	6	0	0.9429	0.4545	0.0689	Protective
SLC9A8	59749	AA	7.1	6	7.2	0	0.7976	0.6356	0.1163	Risk
DPM1	59792	ES	7	6	8	0	0.981	0.3817	0.0662	Risk
AURKA	59872	AD	1.2:1.3	1.1	4	0	0.8929	0.9032	0.1548	Protective
EVA1C	60343	AD	6.3	6.2	7	0	0.9643	0.5693	0.0794	Risk
SH3BGR	60642	AD	1.3	1.2	3.1	0	0.8048	0.7341	0.1593	Protective
C2CD2	60691	AP	1	null	null	0	0.9667	0.4831	0.0779	Risk
C2CD2	60692	AP	3	null	null	0	0.9667	0.4831	0.0779	Protective
TMPRSS3	60709	AA	10.1	9	10.2	0	0.9667	0.6452	0.0721	Protective
ITGB2	60853	ES	2	1	4.2	0	0.9262	0.5035	0.0915	Protective
ADARB1	60867	ES	3	2	4	0	0.8929	0.8729	0.1643	Protective
SLC19A1	60883	AA	8.1	7	8.2	0	0.981	0.3987	0.0639	Risk
YBEY	60918	AD	2.2	2.1	4	0	0.8476	0.5819	0.063	Risk
SLC25A1	61041	AP	1	null	null	0	0.981	0.4236	0.061	Protective
SLC25A1	61042	AP	2	null	null	0	0.981	0.4236	0.061	Risk
YDJC	61233	AD	2.2	2.1	3	0	0.981	0.397	0.064	Protective
GUCD1	61406	AP	1	null	null	0	0.981	0.5478	0.0906	Protective
GUCD1	61407	AP	2	null	null	0	0.981	0.5478	0.0906	Risk
GAS2L1	61594	RI	1.3:1.4	1.2	1.5	0	0.95	0.4247	0.0532	Risk
ZMAT5	61664	ES	2	1	3	0	0.9786	0.4305	0.074	Protective
ASCC2	61680	ES	06:07:00	5	8	0	0.9476	0.9187	0.1848	Protective
GGA1	62120	AP	2	null	null	0	0.9786	0.7439	0.1231	Risk
GGA1	62121	AP	1	null	null	0	0.9786	0.7439	0.1231	Protective
GCAT	62160	AA	2.1	1	2.2	0	0.9786	0.6308	0.134	Protective
MEI1	62455	ES	30	29	31	0	0.7881	0.6587	0.0817	Risk
FBLN1	62665	AT	17	null	null	0	0.981	0.5584	0.1086	Protective
FBLN1	62666	AT	22	null	null	0	0.981	0.5596	0.1083	Protective
HDAC10	62796	ES	14	13	15	0	0.981	0.4336	0.067	Risk
MAPK12	62807	AP	1	null	null	0	0.7857	0.7116	0.148	Protective
MAPK12	62808	AP	2.1	null	null	0	0.7857	0.7116	0.148	Risk
SBF1	62828	ES	29	28	30	0	0.9762	0.728	0.1185	Risk
ODF3B	62856	AP	1	null	null	0	0.9381	0.636	0.1017	Protective
ODF3B	62857	AP	2.1	null	null	0	0.9381	0.636	0.1017	Risk
SETMAR	62996	AA	2.1:2.2	1	2.3	0	0.981	0.9331	0.1521	Protective
SETMAR	63000	ES	2.3:2.4	1	3	1	0.9024	0.9157	0.1642	Protective
TATDN2	63313	AD	7.2	7.1	8	0	0.9714	0.7346	0.1097	Protective
CHCHD4	63518	ES	2	1	4	0	0.9786	0.6611	0.0972	Protective
HACL1	63588	ES	06:07:00	5	8	0	0.9786	0.3567	0.0555	Protective
TBC1D5	63667	ES	5	1	7	0	0.8333	0.7446	0.1289	Risk
RPL15	63732	AD	1.3	1.2	3.2	0	0.981	0.3831	0.0625	Protective
SLC4A7	63780	ES	26	25	27	0	0.8619	0.54	0.0965	Protective
CMTM7	63816	ES	3	2	4.2	0	0.981	0.4183	0.0618	Protective
ZNF619	64234	ES	3	2.2	5	0	0.8238	0.7765	0.118	Risk
KRBOX1	64325	AT	10	null	null	0	0.9476	1	0.2488	Risk
KRBOX1	64326	AT	8	null	null	0	0.9476	1	0.2488	Protective
ZNF662	64334	AA	5.1	3.2	5.2	0	0.8238	1	0.1654	Risk
KIF9	64502	RI	2.2	2.1	2.3	0	0.8643	0.8761	0.155	Protective
ATRIP	64663	AD	1.2:1.3	1.1	2	0	0.8381	0.6351	0.1495	Protective
IP6K2	64765	ES	8.2:11.1	8.1	11.2	0	0.7643	1	0.1825	Risk
IP6K2	64767	AD	8.2	8.1	11.2	0	0.9238	0.7374	0.1323	Risk
QRICH1	64821	ES	3	1	4	0	0.9762	0.376	0.0611	Protective
RHOA	64857	ES	03:04:05	2	6	1	0.981	0.537	0.0696	Risk
RBM6	64939	ES	3.1:3.2	2	4	0	0.969	0.8722	0.1441	Risk
RBM6	64950	ES	04:05:06	2	7	0	0.9214	0.8671	0.1537	Protective
RBM6	64952	ES	3.2:4:5	2	7	0	0.9643	1	0.1775	Protective
RBM6	64953	ES	04:05:00	2	7	0	0.8262	0.6264	0.1102	Protective
HYAL3	64983	AP	1	null	null	0	0.9786	0.4569	0.0907	Protective
HYAL3	64984	AP	2	null	null	0	0.9786	0.4569	0.0907	Risk
PCBP4	65137	ES	3	2.2	5	0	0.9714	0.4341	0.0847	Protective
RPL29	65167	RI	3.2	3.1	3.3	0	0.981	0.5801	0.107	Protective
RPL29	65174	AD	1.3:1.4	1.2	2	0	0.9357	0.6348	0.1105	Risk
CCDC66	65350	ES	5	4	7.1	0	0.8524	0.9143	0.1469	Protective
ATXN7	65514	AP	3	null	null	0	0.8786	1	0.1929	Protective
ZNF717	65633	AP	2	null	null	0	0.981	0.7195	0.1222	Protective
ZNF717	65634	AP	1	null	null	0	0.981	0.7195	0.1222	Risk
PROS1	65674	AP	1	null	null	0	0.8571	0.8984	0.1008	Risk
PROS1	65675	AP	2	null	null	0	0.8571	0.8984	0.1008	Protective
ARL6	65735	ES	2	1	4	0	0.8619	0.6387	0.0847	Risk
ST3GAL6	65793	AT	11	null	null	0	0.981	0.5863	0.1075	Risk
ST3GAL6	65794	AT	16	null	null	0	0.981	0.5978	0.103	Protective
TBC1D23	65817	ES	15	14	16	0	0.9738	1	0.1999	Risk
SENP7	65946	ES	6	5	7	0	0.9524	0.629	0.1108	Risk
SENP7	65951	ES	5	4	7	0	0.8024	1	0.2061	Protective
BOC	66195	AA	12.1	11	12.2	0	0.981	0.7397	0.0879	Protective
TIMMDC1	66312	ES	03:04:00	1.1	5	0	0.769	1	0.2062	Protective
TIMMDC1	66316	ES	5	1.1	6	0	0.8881	1	0.1667	Risk
MYLK	66478	AP	21	null	null	0	0.95	0.9601	0.1793	Risk
ATP2C1	66764	ES	29.1	28	30	0	0.969	0.6308	0.0986	Protective
NEK11	66784	ES	20	19	21	0	0.9667	0.5504	0.0706	Protective
ARMC8	66966	ES	2.2:3	1	4	0	0.969	0.623	0.1167	Protective
CEP70	67003	ES	3.3:4:5:6	2	7.1	0	0.7643	0.8942	0.2106	Protective
ACPL2	67063	ES	6	5	9	0	0.9452	0.7474	0.1101	Protective
TFDP2	67090	AA	11.1	10	11.2	0	0.981	0.5028	0.0613	Protective
PLOD2	67137	ES	15	14	16	0	0.9738	0.9612	0.2027	Risk
AP2M1	67841	ES	7	6	8	0	0.981	0.4281	0.0756	Risk
EIF4G1	67906	ES	2.4:3.2:5	1	6	0	0.9262	0.6366	0.1119	Risk
FAM131A	67925	AP	3	null	null	0	0.981	0.3912	0.059	Protective
IL1RAP	68105	AT	10.2	null	null	0	0.981	0.587	0.1248	Protective
PIGZ	68273	AA	3.1	2	3.2	0	0.9048	0.5148	0.0581	Risk
HAUS3	68551	AD	1.2:1.3	1.1	2	0	0.9595	0.7596	0.1324	Risk
RGS12	68644	ES	7.2	5	8	0	0.9214	0.3175	0.056	Risk
CC2D2A	68809	ES	5	4	6	0	0.9738	1	0.1805	Risk
PACRGL	68892	ES	6:7:8:9:12	5	13.1	0	0.9286	0.4848	0.089	Protective
RBM47	69086	AP	1	null	null	0	0.981	0.5972	0.0787	Protective
RBM47	69088	AP	2	null	null	0	0.981	0.8223	0.1291	Risk
NFXL1	69185	AP	2	null	null	0	0.8119	0.7953	0.1791	Risk
NFXL1	69186	AP	1.1	null	null	0	0.8119	0.7953	0.1791	Protective
HOPX	69372	RI	4.3:4.4:4.5	4.2	4.6	0	0.9381	0.5746	0.0796	Protective
ANKRD17	69480	AP	2	null	null	0	0.981	0.5124	0.0673	Protective
ANKRD17	69481	AP	1	null	null	0	0.981	0.5124	0.0673	Risk
ANKRD17	69482	ES	16	15	17	0	0.981	0.7242	0.1116	Risk
SDAD1	69572	AA	3.1:3.2	2	3.3	0	0.9595	0.5378	0.0934	Protective
FRAS1	69637	AT	77	null	null	0	0.9452	0.9208	0.1328	Risk
FRAS1	69639	AT	21	null	null	0	0.9452	0.5211	0.0513	Protective
FAM175A	69801	ES	7	6	8	0	0.9429	0.4529	0.0511	Risk
NFKB1	70108	AP	2	null	null	0	0.9762	0.365	0.0669	Risk
NFKB1	70110	AP	1	null	null	0	0.9762	0.3675	0.0708	Protective
UBE2D3	70117	AP	3.1	null	null	0	0.981	0.4964	0.0982	Risk
NPNT	70260	ES	11	10	12	0	0.8286	0.5181	0.0815	Risk
SLC10A7	70775	ES	13	12	14	0	0.8214	0.8618	0.1912	Protective
DCTD	71241	ES	2.1:2.2:3	1.2	5	0	0.9786	0.4963	0.0891	Protective
DCTD	71253	AD	1.2	1.1	5	0	0.981	0.4467	0.0665	Risk
ADAMTS16	71514	AT	11.2	null	null	0	0.8619	0.7475	0.1165	Protective
ADAMTS16	71515	AT	23	null	null	0	0.8619	0.7475	0.1165	Risk
MYO10	71601	AP	1	null	null	0	0.9786	0.5098	0.0645	Protective
DROSHA	71627	ES	7	6	8	0	0.9762	0.7958	0.1202	Risk
TTC23L	71732	RI	7.2	7.1	7.3	0	0.8167	0.9393	0.2818	Protective
NIPBL	71817	AT	47	null	null	0	0.981	0.5473	0.0792	Risk
NIPBL	71818	AT	46.2	null	null	0	0.981	0.5473	0.0792	Protective
ZNF131	71934	ES	5.2:6:7.1:7.2:7.4:8:9.1:9.2	5.1	9.3	0	0.8024	0.4728	0.0679	Risk
NNT	71963	AP	1	null	null	0	0.9452	0.9231	0.152	Protective
NNT	71964	AP	2	null	null	0	0.9452	0.9231	0.152	Risk
FST	72007	AA	6.1	5	6.2	0	0.8286	0.71	0.0873	Protective
PDE4D	72135	AP	10	null	null	0	0.9167	0.9561	0.203	Risk
PDE4D	72144	AP	1	null	null	0	0.9167	1	0.3073	Protective
PDE4D	72145	AT	8.2	null	null	0	0.981	0.8047	0.1079	Protective
PDE4D	72147	AT	31	null	null	0	0.981	0.9279	0.1293	Risk
TRAPPC13	72245	ES	9	7	10	0	0.9452	0.7503	0.1277	Risk
PIK3R1	72294	AP	1.1	null	null	0	0.9667	1	0.2421	Risk
GTF2H2C	72400	AD	1.2	1.1	3	0	0.9667	1	0.1356	Protective
CKMT2	72660	ES	2	1.1	3	0	0.8738	1	0.1435	Risk
MEF2C	72759	AA	4.1	3	4.2	0	0.8381	0.828	0.1531	Protective
RGMB	72880	AP	3.1	null	null	0	0.9667	0.5939	0.1147	Risk
RGMB	72881	AP	1	null	null	0	0.9667	0.5939	0.1147	Protective
PAM	72888	AA	25.1	23.2	25.2	0	0.981	0.5316	0.0545	Risk
PAM	72904	ES	23.2	22	25.1	1	0.9738	0.5385	0.0635	Risk
PAM	72906	ES	14	13	15	0	0.981	0.6771	0.1176	Risk
C5orf30	72918	AP	1	null	null	0	0.9333	0.8183	0.1372	Protective
C5orf30	72920	AP	3	null	null	0	0.9333	0.6451	0.0873	Risk
NUDT12	72921	AD	2.2	2.1	3	0	0.8524	0.5799	0.0924	Protective
CSNK1G3	73145	ES	13	12	14	0	0.9548	0.9454	0.1507	Risk
UQCRQ	73320	ES	1.2:1.4	1.1	2	1	0.9714	0.4322	0.0917	Risk
PHF15	73399	AP	1.1	null	null	0	0.9071	0.5567	0.0803	Risk
PHF15	73400	AP	2	null	null	0	0.9071	0.5567	0.0803	Protective
REEP2	73546	AA	6.1	5	6.2	0	0.919	0.6346	0.0831	Risk
MATR3	73587	ES	8	4	9	0	0.8548	0.7018	0.1011	Protective
HARS2	73763	AA	2.1	1.3	2.2	0	0.9714	0.8408	0.0955	Protective
PCDHA2	73769	AT	2	null	null	0	0.9333	0.6997	0.1485	Protective
PCDHA2	73770	AT	5	null	null	0	0.9333	0.7716	0.1824	Risk
TCOF1	74070	ES	22	21	23	0	0.981	0.6878	0.0812	Risk
FAXDC2	74222	AP	5.1	null	null	0	0.9119	0.8148	0.1533	Protective
FAXDC2	74223	AP	3	null	null	0	0.9119	0.8148	0.1546	Risk
FBXW11	74545	ES	4	1	5	0	0.8929	1	0.1485	Protective
RGS14	74759	ES	14	13	15	1	0.8095	0.3311	0.0544	Risk
SERPINB6	75147	AP	4	null	null	0	0.981	0.7943	0.0967	Protective
BPHL	75167	ES	2	1.2	3	0	0.9738	0.9452	0.123	Protective
LYRM4	75240	AT	3	null	null	0	0.981	0.7069	0.1211	Protective
LYRM4	75241	AT	7	null	null	0	0.981	0.702	0.1194	Risk
TBC1D7	75381	ES	3	2.2	4.1	0	0.981	0.4022	0.0691	Protective
SIRT5	75389	AP	1	null	null	0	0.9714	0.6199	0.0911	Risk
SIRT5	75390	AP	2	null	null	0	0.9714	0.6199	0.0911	Protective
BTN2A1	75670	AA	9.1	8	9.2	0	0.9738	0.9349	0.1254	Protective
LEMD2	75766	AP	1.1	null	null	0	0.981	0.4274	0.0672	Risk
LEMD2	75767	AP	2.1	null	null	0	0.981	0.4274	0.0672	Protective
ETV7	75975	ES	02:03:00	1	4	0	0.931	0.6564	0.1008	Protective
PTK7	76251	ES	09:10:00	8.1	12	0	0.7786	1	0.2015	Risk
RUNX2	76398	AP	2.1	null	null	0	0.931	1	0.3112	Protective
RUNX2	76399	AP	1.1	null	null	0	0.931	1	0.3112	Risk
GPR110	76436	AT	17	null	null	0	0.9048	0.9123	0.2044	Risk
GPR110	76437	AT	8	null	null	0	0.9048	0.9123	0.2044	Protective
MTO1	76748	ES	8	7	9	0	0.969	0.8321	0.104	Risk
NT5E	76916	AT	3.2	null	null	0	0.981	0.3539	0.0629	Protective
NT5E	76917	AT	9	null	null	0	0.981	0.3539	0.0629	Risk
PNISR	77056	ES	2	1	3	0	0.981	0.5318	0.0973	Protective
C6orf203	77126	AD	1.2	1.1	3	0	0.9786	0.7881	0.1517	Risk
CEP57L1	77160	AT	15	null	null	0	0.981	0.4945	0.0573	Risk
CEP57L1	77161	AT	10.2	null	null	0	0.981	0.4945	0.0573	Protective
PPIL6	77196	ES	2	1	3	0	0.95	0.7364	0.1154	Protective
FYN	77273	ME	11|12	10	13	0	0.981	0.7282	0.1252	Risk
HDDC2	77424	ES	3.1	2	5	0	0.981	0.5553	0.0841	Protective
RNF146	77454	AD	1.3	1.2	2	0	0.9571	0.2896	0.0564	Risk
EPB41L2	77560	ES	20.1	14	21	0	0.8167	0.6221	0.0835	Risk
MTFR2	77902	AD	1.2	1.1	2	0	0.869	0.9549	0.1807	Risk
IL20RA	77929	ES	4	3	5.1	0	0.8738	0.7229	0.1214	Protective
PLEKHG1	78148	AP	3	null	null	0	0.8952	1	0.249	Protective
PLEKHG1	78149	AP	1	null	null	0	0.8952	1	0.249	Risk
SOD2	78304	RI	8.2	8.1	8.3	0	0.981	0.6551	0.117	Risk
PACRG	78397	AP	2.1	null	null	0	0.7929	1	0.259	Risk
PACRG	78398	AP	1	null	null	0	0.7929	1	0.259	Protective
PDCD2	78498	AT	7	null	null	0	0.981	0.5484	0.0987	Risk
NUDT1	78606	AP	1	null	null	0	0.9786	0.6475	0.1078	Risk
NUDT1	78608	AP	2	null	null	0	0.9786	0.6135	0.1021	Protective
IL6	78931	AT	5	null	null	0	0.9452	0.3811	0.0672	Risk
IL6	78932	AT	4.2	null	null	0	0.9452	0.3811	0.0672	Protective
GPNMB	78966	AA	7.1	6	7.2	0	0.9714	0.7053	0.0768	Protective
FAM221A	78998	ES	2	1	4	0	0.981	0.9413	0.1248	Protective
GGCT	79138	ES	4	3	5	0	0.981	0.5748	0.0961	Protective
POLM	79455	AA	9.1	8	9.2	0	0.9452	0.4752	0.0505	Protective
FIGNL1	79694	AA	2.2:2.3:2.4:2.5	1	2.6	0	0.7643	1	0.2841	Protective
SUMF2	79801	ES	4	3	6	0	0.95	1	0.141	Protective
EIF4H	80063	ES	5	4	6	0	0.981	0.4744	0.0612	Protective
KRIT1	80429	AD	1.3:1.4:1.5	1.2	2.1	0	0.8976	1	0.1908	Protective
ZSCAN25	80706	AD	4.3	4.2	5	0	0.9048	0.4546	0.0685	Risk
PILRB	80936	RI	8.4	8.3	8.5	0	0.9762	0.6859	0.1408	Risk
SLC12A9	81010	AD	1.2	1.1	2	0	0.8952	0.8403	0.1324	Protective
NAPEPLD	81166	AP	2.1	null	null	0	0.9357	0.8376	0.1358	Risk
NAPEPLD	81167	AP	1	null	null	0	0.9357	0.8376	0.1358	Protective
AHCYL2	81742	AP	1	null	null	0	0.9429	0.6183	0.0953	Risk
AHCYL2	81744	AP	3	null	null	0	0.9429	0.6183	0.0771	Protective
TMEM209	81770	AP	2	null	null	0	0.8762	0.4672	0.0576	Protective
TMEM209	81771	AP	1	null	null	0	0.8762	0.4672	0.0576	Risk
CHCHD3	81833	AT	13	null	null	0	0.981	0.6448	0.084	Protective
CHCHD3	81834	AT	3	null	null	0	0.981	0.6463	0.0845	Risk
C7orf49	81875	AD	2.2:2.3:2.4	2.1	3	0	0.9357	0.5535	0.0865	Protective
EZH2	82157	ES	13	12	14.1	0	0.9738	0.388	0.0711	Risk
ZNF786	82164	ES	2	1	3	0	0.881	1	0.2405	Protective
REPIN1	82247	ES	2.2:3.2	2.1	5.2	0	0.981	0.7422	0.1209	Protective
NUB1	82368	AT	10	null	null	0	0.981	0.7803	0.151	Protective
NUB1	82369	AT	17	null	null	0	0.981	0.7803	0.151	Risk
FAM86B1	82685	ES	5	4	6	0	0.8786	0.844	0.1273	Risk
PCM1	82837	AD	30.2	30.1	31	0	0.9786	0.7352	0.086	Protective
PCM1	82842	ES	7	6	8	0	0.9095	1	0.1558	Protective
DMTN	82928	ES	18.2	16	19	0	0.9643	0.86	0.1282	Risk
DPYSL2	83132	AP	1	null	null	0	0.981	0.3822	0.0526	Risk
LETM2	83405	RI	3.3	3.2	3.4	0	0.9619	0.7145	0.1501	Protective
RNF170	83745	ES	5	4	6	0	0.9786	0.6034	0.0617	Protective
LYN	83881	AD	2.2	2.1	3	0	0.9405	0.864	0.1032	Protective
CHCHD7	83913	ES	2.1:2.2	1	4	0	0.981	0.7706	0.1238	Protective
CHCHD7	83914	ES	2.1	1	4	0	0.981	0.6281	0.1163	Protective
C8orf46	84018	AT	7	null	null	0	0.9429	0.4771	0.0864	Risk
C8orf46	84019	AT	6.2	null	null	0	0.9429	0.4771	0.0864	Protective
C8orf44	84030	ES	3	1	4	0	0.9762	0.8362	0.1556	Protective
COPS5	84068	ES	2.2:2.3:3	2.1	5	1	0.769	0.7672	0.1471	Protective
CSPP1	84078	ES	20	19	21	0	0.9762	0.6007	0.0842	Risk
PEX2	84241	ES	4.2	2.2	5	0	0.9643	0.7366	0.133	Protective
TRIQK	84502	ES	4	2.1	6.1	0	0.9667	0.4752	0.054	Risk
DPY19L4	84572	ES	3	2	4	0	0.969	0.7194	0.1042	Risk
EIF3H	84957	ES	05:06:00	3.2	7	1	0.9619	0.7399	0.1286	Protective
ZHX1	85049	AP	1	null	null	0	0.95	0.6917	0.0872	Protective
ZHX1	85050	AP	2.1	null	null	0	0.95	0.6917	0.0872	Risk
ZHX1	85052	AD	2.2	2.1	3	0	0.919	0.9175	0.1346	Protective
TATDN1	85093	ES	1.2:2:3	1.1	4.1	0	0.919	0.8999	0.1048	Protective
FAM49B	85160	ES	5	4	6	0	0.981	0.7174	0.1182	Protective
FAM49B	85161	ES	5	3	6	0	0.9714	0.908	0.104	Protective
EEF1D	85454	ES	6:7.2:8.1	1	8.2	0	0.981	0.7478	0.0789	Protective
MROH1	85542	AT	14	null	null	0	0.981	0.7022	0.1239	Protective
MROH1	85543	AT	45	null	null	0	0.981	0.7022	0.1239	Risk
SLC52A2	85575	AD	1.4	1.3	2.2	0	0.9714	0.3942	0.0582	Risk
VPS28	85606	RI	3.5:3.6	3.4	3.7	0	0.9643	1	0.1843	Risk
KDM4C	85822	AP	1	null	null	0	0.9762	0.9223	0.1765	Protective
KDM4C	85823	AP	2	null	null	0	0.9762	0.9223	0.1783	Risk
MPDZ	85874	ES	38	37	39	0	0.8952	0.4143	0.0686	Risk
CCDC107	86267	RI	3.2	3.1	3.3	0	0.981	0.3094	0.0571	Protective
TMEM8B	86317	AP	1	null	null	0	0.981	0.6835	0.1051	Protective
RNF38	86346	AP	3	null	null	0	0.9429	0.6477	0.1074	Protective
RNF38	86347	AP	2	null	null	0	0.9429	0.9425	0.1394	Risk
SEMA4D	86813	ES	4.2	3	5	0	0.8833	0.9128	0.1545	Protective
WNK2	86906	AA	30.1	29	30.2	0	0.8214	0.5112	0.1112	Risk
WNK2	86910	AA	22.1	21	22.2	0	0.8262	0.7814	0.1005	Protective
ANKS6	87048	ES	3	2	4	1	0.9238	0.4711	0.0861	Protective
NR4A3	87062	AT	9	null	null	0	0.9762	0.4891	0.0671	Protective
NR4A3	87063	AT	6.2	null	null	0	0.9762	0.4891	0.0671	Risk
RGS3	87289	AP	25	null	null	0	0.981	0.3648	0.061	Risk
KIF12	87305	ES	15	14	16	0	0.931	1	0.1873	Protective
GSN	87421	AP	9	null	null	0	0.981	0.8503	0.1874	Risk
GSN	87422	AP	14	null	null	0	0.981	0.876	0.1911	Protective
NEK6	87524	AP	3	null	null	0	0.981	0.2987	0.0554	Risk
NEK6	87526	AP	2	null	null	0	0.981	0.511	0.0689	Protective
RABEPK	87558	ES	7.1	4	8	1	0.9071	0.8619	0.1482	Risk
FPGS	87667	AP	2	null	null	0	0.981	0.3899	0.0684	Risk
FPGS	87668	AP	1	null	null	0	0.981	0.3899	0.0684	Protective
COQ4	87735	AT	2.3	null	null	0	0.981	0.5918	0.1014	Protective
COQ4	87736	AT	7	null	null	0	0.981	0.5442	0.0961	Risk
DOLPP1	87822	ES	6	5	7	0	0.981	0.4989	0.0731	Risk
POMT1	87950	ES	02:03:00	1.1	4	0	0.9595	0.5603	0.066	Protective
SETX	87976	ES	26	25	27	0	0.9786	0.5913	0.0857	Protective
ADAMTS13	88052	AD	25.2	25.1	27	0	0.819	0.5671	0.1052	Protective
CARD9	88161	AA	8.1	7	8.2	0	0.9262	1	0.1778	Protective
UAP1L1	88265	RI	2.2	2.1	2.3	0	0.8429	1	0.1822	Protective
GYG2	88416	ES	3	2	4	0	0.7548	0.679	0.1153	Risk
TBL1X	88448	AP	2	null	null	0	0.8857	0.9277	0.1595	Risk
TBL1X	88449	AP	1	null	null	0	0.8857	0.9277	0.1595	Protective
MID1	88461	AP	3.1	null	null	0	0.9357	0.8684	0.2054	Risk
MID1	88463	AP	1	null	null	0	0.9357	0.9512	0.2176	Protective
RAI2	88592	AP	2	null	null	0	0.9786	0.7197	0.1192	Risk
RAI2	88593	AP	1	null	null	0	0.9786	0.7197	0.1192	Protective
SH3KBP1	88641	AP	1	null	null	0	0.981	0.8478	0.1616	Risk
SH3KBP1	88643	AP	10	null	null	0	0.981	0.7941	0.1538	Protective
RPGR	88808	ES	14.1:14.3	13	16	0	0.9524	1	0.1961	Protective
KRBOX4	88892	ES	5.2:6	5.1	8.1	0	0.9024	1	0.2127	Protective
UXT	88941	RI	1.2	1.1	1.3	0	0.981	0.2938	0.0512	Protective
CCDC120	89064	AD	3.2:3.3	3.1	4.1	0	0.9714	0.3862	0.0587	Risk
KDM5C	89193	AA	7.1	6	7.2	0	0.9762	0.4686	0.0563	Protective
ATP7A	89537	ES	10	9	11	0	0.8286	0.4427	0.0837	Protective
TRMT2B	89625	RI	2.2	2.1	2.3	0	0.8214	0.639	0.1343	Risk
TRMT2B	89626	AD	2.2:2.3	2.1	3	0	0.8095	1	0.1991	Risk
ARMCX4	89650	RI	18.2	18.1	18.3	0	0.7833	0.9792	0.2498	Risk
TSC22D3	89839	RI	2.2:2.3	2.1	2.4	0	0.9524	0.5199	0.0581	Risk
SLC25A14	90099	ES	8	7	9.1	0	0.9619	0.6591	0.0774	Protective
FAM122B	90156	AA	10.1	9	10.2	0	0.981	0.3386	0.0571	Protective
HTATSF1	90209	AP	2.1	null	null	0	0.9738	0.8757	0.1228	Risk
HTATSF1	90210	AP	1	null	null	0	0.9738	0.8757	0.1228	Protective
FMR1	90268	AA	16.1	15	16.2	0	0.9786	0.3853	0.0502	Protective
ZNF185	90411	ES	8	7	9.1	0	0.9619	0.9468	0.0605	Risk
IRAK1	90547	ES	10.1:10.3	9	11.1	0	0.9357	1	0.1868	Risk
FLNA	90565	ES	30	29	31	0	0.981	0.5441	0.0968	Risk
TMLHE	90681	AT	7	null	null	0	0.981	0.4065	0.0718	Protective
TMLHE	90682	AT	9	null	null	0	0.981	0.4065	0.0718	Risk
C1orf86	90749	ES	7.1:8	5	10	1	0.9548	0.9464	0.2105	Risk
ERI3	90948	ES	2.2	1	5	1	0.9452	0.8218	0.1454	Protective
DCAF6	91280	ES	11:13:01.100000	10	15	1	0.8286	0.9284	0.213	Protective
DCAF6	91282	ES	14	10	15	1	0.8095	0.3938	0.0549	Protective
RPP38	91486	ES	2	1.2	3.1	1	0.9738	0.589	0.0817	Protective
CALHM2	91836	ES	3.2	2	4.1	1	0.8262	0.7608	0.1238	Risk
ATE1	91855	ME	8|9	7	10	0	0.9405	0.8308	0.1513	Risk
MTL5	92709	ES	04:05:00	3	6.1	1	0.9619	0.9257	0.2176	Protective
GOLT1B	92984	ME	3|4	2	5	0	0.8905	0.7528	0.1645	Risk
TARBP2	93160	ES	3.2:3.3	1.2	4.1	1	0.8905	0.7629	0.149	Risk
SRGAP1	93242	ME	12|13	11	14	0	0.8452	0.8863	0.1521	Risk
RPLP0	93346	ES	1.3:1.4:1.5	1.1	2	1	0.8071	0.7299	0.1517	Risk
CRAMP1L	93824	ES	16	15	17	1	0.8262	0.9114	0.1163	Risk
TSC2	93836	ES	27	26	28.2	1	0.8571	0.7105	0.1422	Protective
NPIPB3	93953	ES	8.5:8.7:8.8:9:10:11	8.4	12.1	1	0.981	0.289	0.0522	Risk
NPIPB3	93984	ES	8.5:8.7:12.2:12.3:12.4:12.5:12.6:12.7:13.1	8.4	13.3	1	0.9286	0.683	0.0807	Protective
PQLC1	94848	ES	07:09:00	6	10	1	0.8119	0.9313	0.1964	Protective
NDUFA13	95093	ES	2.1:2.2	1	3	1	0.7738	0.8484	0.1911	Risk
ZNF90	95106	ES	6	3	7	1	0.7595	0.9581	0.1697	Risk
NDUFA3	95376	ES	4.1:4.3	2	5.1	1	0.9643	0.6934	0.1333	Risk
HM13	95905	ES	11	10	12.1	1	0.95	0.3946	0.0783	Risk
DCAF16	96683	ES	2	1	3.1	1	0.8738	0.5414	0.0977	Protective
PDCD6	96852	ES	6.1	4	7	1	0.7976	0.7674	0.1567	Protective
RABL5	97660	ES	02:03:02.200000	1	5	1	0.8405	0.4495	0.0727	Protective
EEF1D	98099	ES	6	1	7.2	1	0.9738	0.7291	0.1233	Protective
AP1G2	99354	ES	5	4	6	1	0.919	0.6691	0.11	Protective
EHMT1	99859	ES	7	6	8	1	0.8405	0.4682	0.0805	Protective
HEXIM2	100144	ES	3	2.2	4	1	0.8	0.7785	0.1387	Protective
MUC16	100407	ES	15:16:17:18:19	14	45	1	0.9	0.6124	0.0807	Protective
PDE6B	100561	ES	22	21	23.1	1	0.931	0.5406	0.0894	Risk
UBXN11	101234	ES	04:05:00	2	7	1	0.9667	0.6482	0.105	Protective
DMKN	101866	ES	7	6.4	8	1	0.9357	0.6335	0.104	Risk
RABEPK	102641	ES	5	4	8	1	0.8048	0.644	0.1301	Risk
JMJD4	107544	ES	5.1	4	6	1	0.781	0.848	0.1745	Risk
NR1H3	114106	ES	3.5:5.2:6.2	1	7	1	0.7976	0.779	0.2102	Protective
ZNF3	115234	ES	2.1:2.2	1	4.2	1	0.7738	0.5217	0.069	Protective
KLK8	117218	ES	4.2:6	3	7	1	0.7833	0.4743	0.071	Risk
PLD3	117708	ES	4	1.1	5.2	1	0.8214	0.5612	0.1065	Protective
RPS25	117936	ES	3.1:3.2	1	4	1	0.9405	0.9114	0.1782	Protective
LPAR2	119052	ES	3	2.2	4	1	0.8357	0.5896	0.1079	Protective
PHKA2	120517	ES	1 day, 4:29:00	27	30	1	0.7667	0.7259	0.1024	Protective
COX4I1	156375	ES	5.1:5.3	4.1	5.4	1	0.969	0.5736	0.1409	Protective
ALDOA	239077	ES	7.2	6.3	9	1	0.7571	0.923	0.2061	Risk
MUC16	252256	ES	17:18:19:20:21:22:23:24:25:26	16	32	1	0.85	0.5928	0.0814	Protective
RPL13A	264941	ES	2.1:2.2	1	3	1	0.9571	0.7459	0.1296	Protective
RAB28	265743	ME	7|8	6	9	0	0.9262	0.4858	0.0599	Risk
COL1A1	265918	ES	18:19:20:21:22:23:24:28:29:30:31:33:34:35:36:37:38:39	17	40	1	0.7857	0.6691	0.098	Risk
ATP5A1	300060	ES	4.2:4.3	3.2	6.1	1	0.8214	0.812	0.1743	Protective
COL1A1	848530	ES	27:28:29:30:31:33:34:35:36:37:38:39:40:41:42:43	26	44	1	0.9357	0.3718	0.0539	Risk
COL1A1	848613	ES	27:28:29:30:31:32:33:43	26	44	1	0.9095	0.5731	0.069	Risk
COL1A2	1412008	ES	23:24:25:26:27:28:29:30:31:32:33:34:35:36:37:45:46:47	22	48	1	0.7952	0.6737	0.0953	Protective
COL1A1	1557940	ES	9:10:11:12:13:14:15:16:20:21:22:23:24:25:26:27:28:29:30:31:32:33:34:35:36:37:38:39:40:41:42:43:44:45:46	8	47	1	0.7952	0.5474	0.0849	Protective
COL1A1	1557957	ES	9:10:11:12:13:14:15:25:26:27:28:29:30:31:32:33:34:35:36:37:38:39:40:41:42:43:44:45:46	8	47	1	0.7881	0.49	0.0811	Protective
COL1A1	1557975	ES	9:10:11:12:13:14:15:16:17:18:19:20:21:22:23:24:27:28:29:30:31:32:33:34:35:36:37:38:39:40:41:42:43:44:45:46	8	47	1	0.7952	0.451	0.0848	Protective
COL1A1	1566887	ES	9:10:11:12:13:14:15:16:17:18:19:20:21:22:28:29:30:31:32:33:34:35:36:37:38:41:42:43:44:45:46	8	47	1	0.8119	0.4403	0.0719	Protective
